# Supplementary material
Source: PubMed Central journal article supplement (PMC1446083)

# Supplemental Figure 1

Raw Data for Hybridization 1

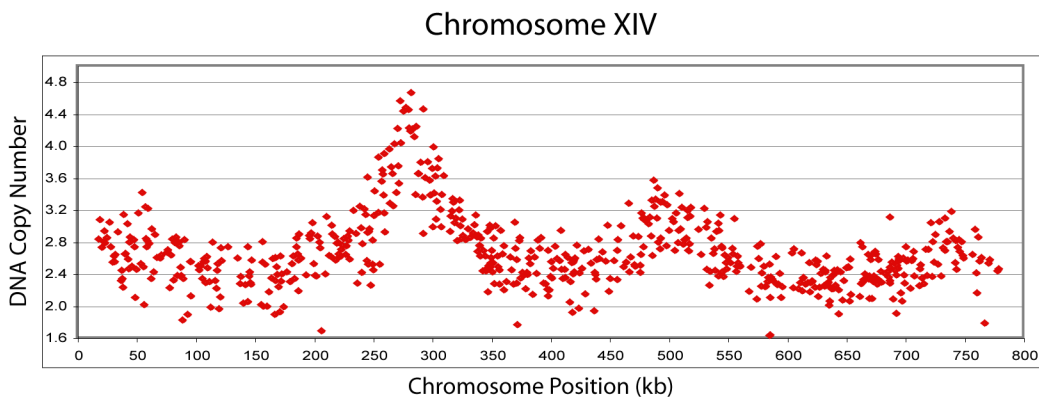

Raw Data for Hybridization 2

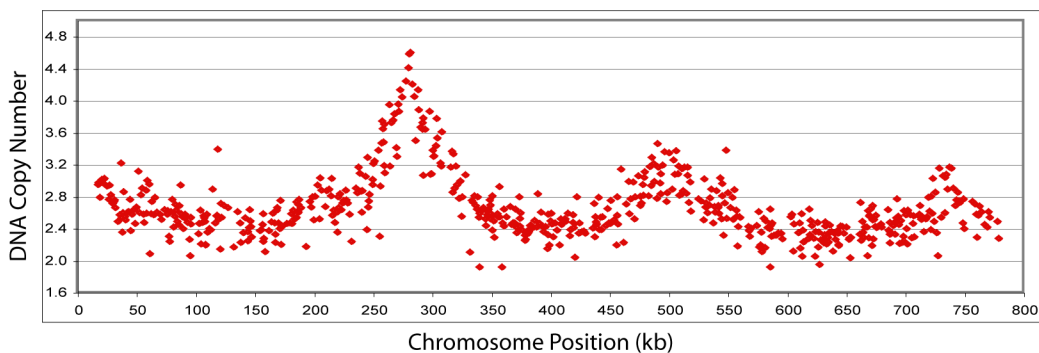

Raw Data for Hybridization 3

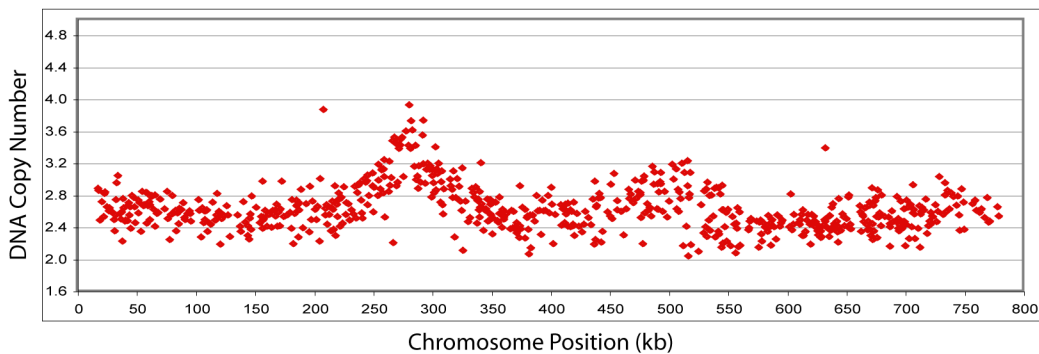

Raw Data for Hybridization 4

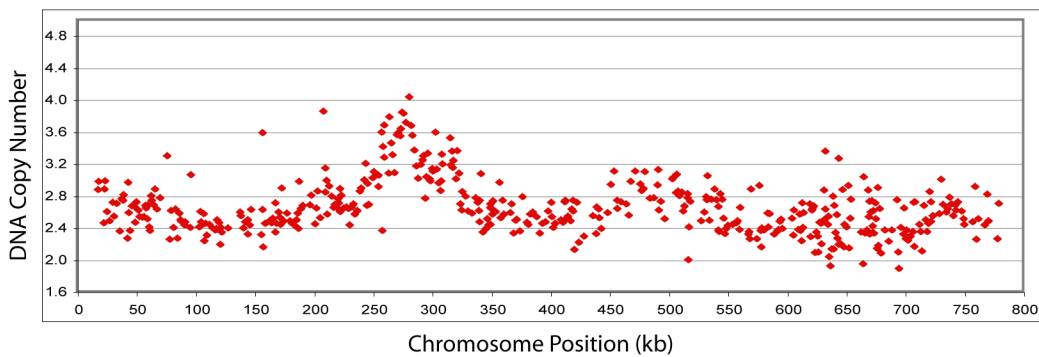

Smoothed profile generated from the 4 hybridizations

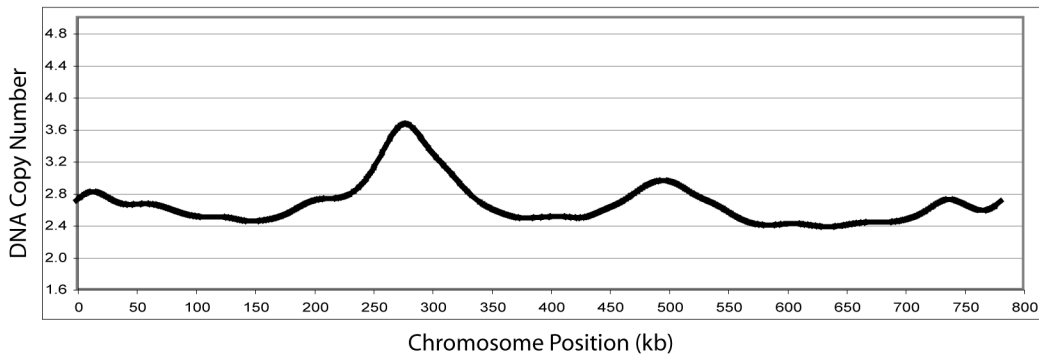

# Supplemental Figure 2

S288c S phase

Raghuraman *et al.*

Yabuki *et al.*

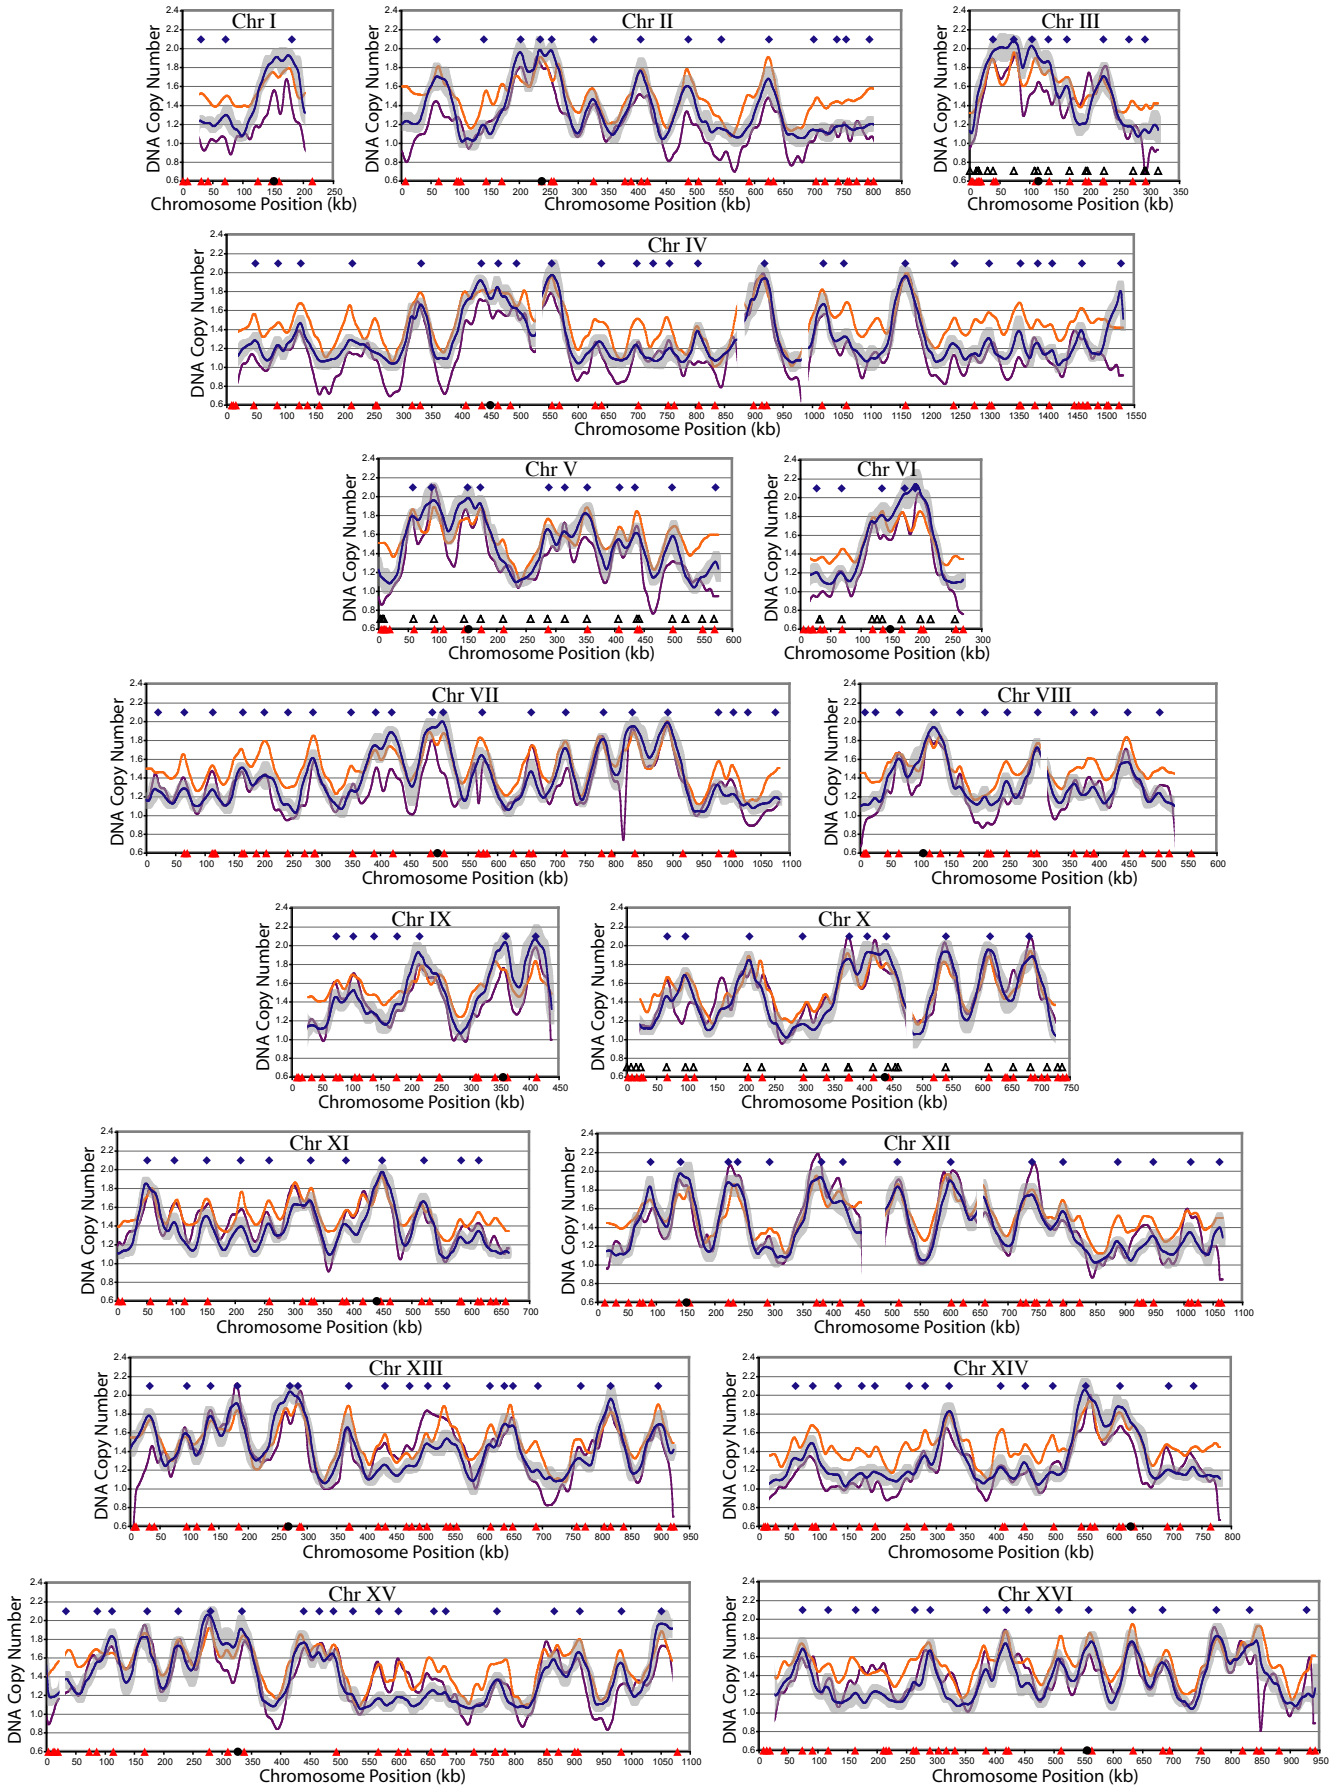

# Supplemental Figure 3

A364a S phase      OMC S phase

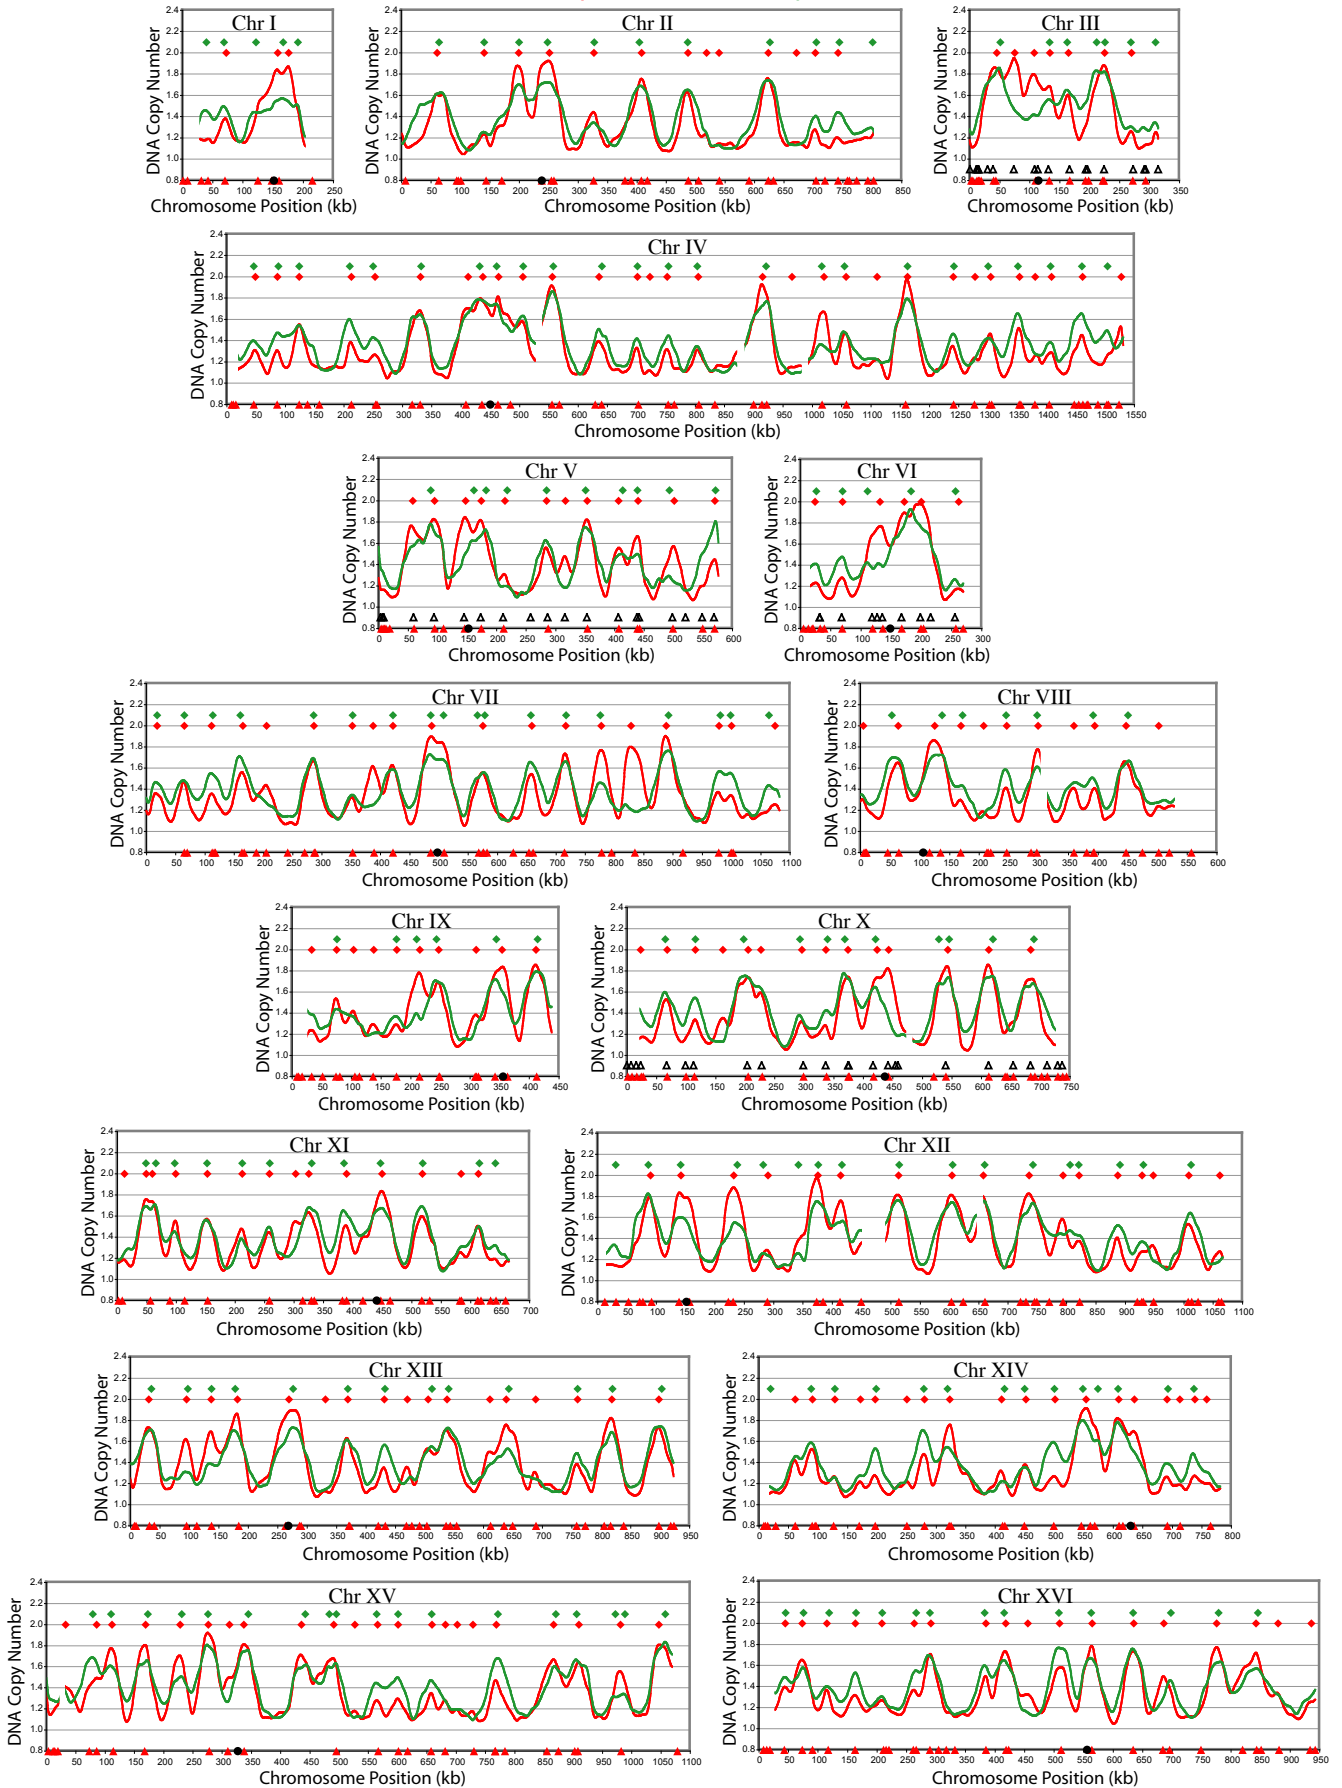

# Supplemental Figure 4

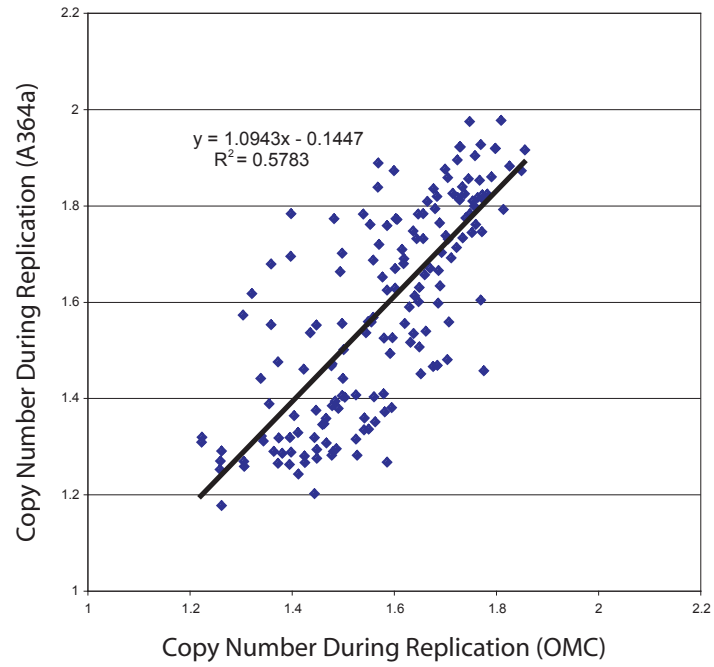

# Supplemental Figure 5

S288c S phase

A364a S phase

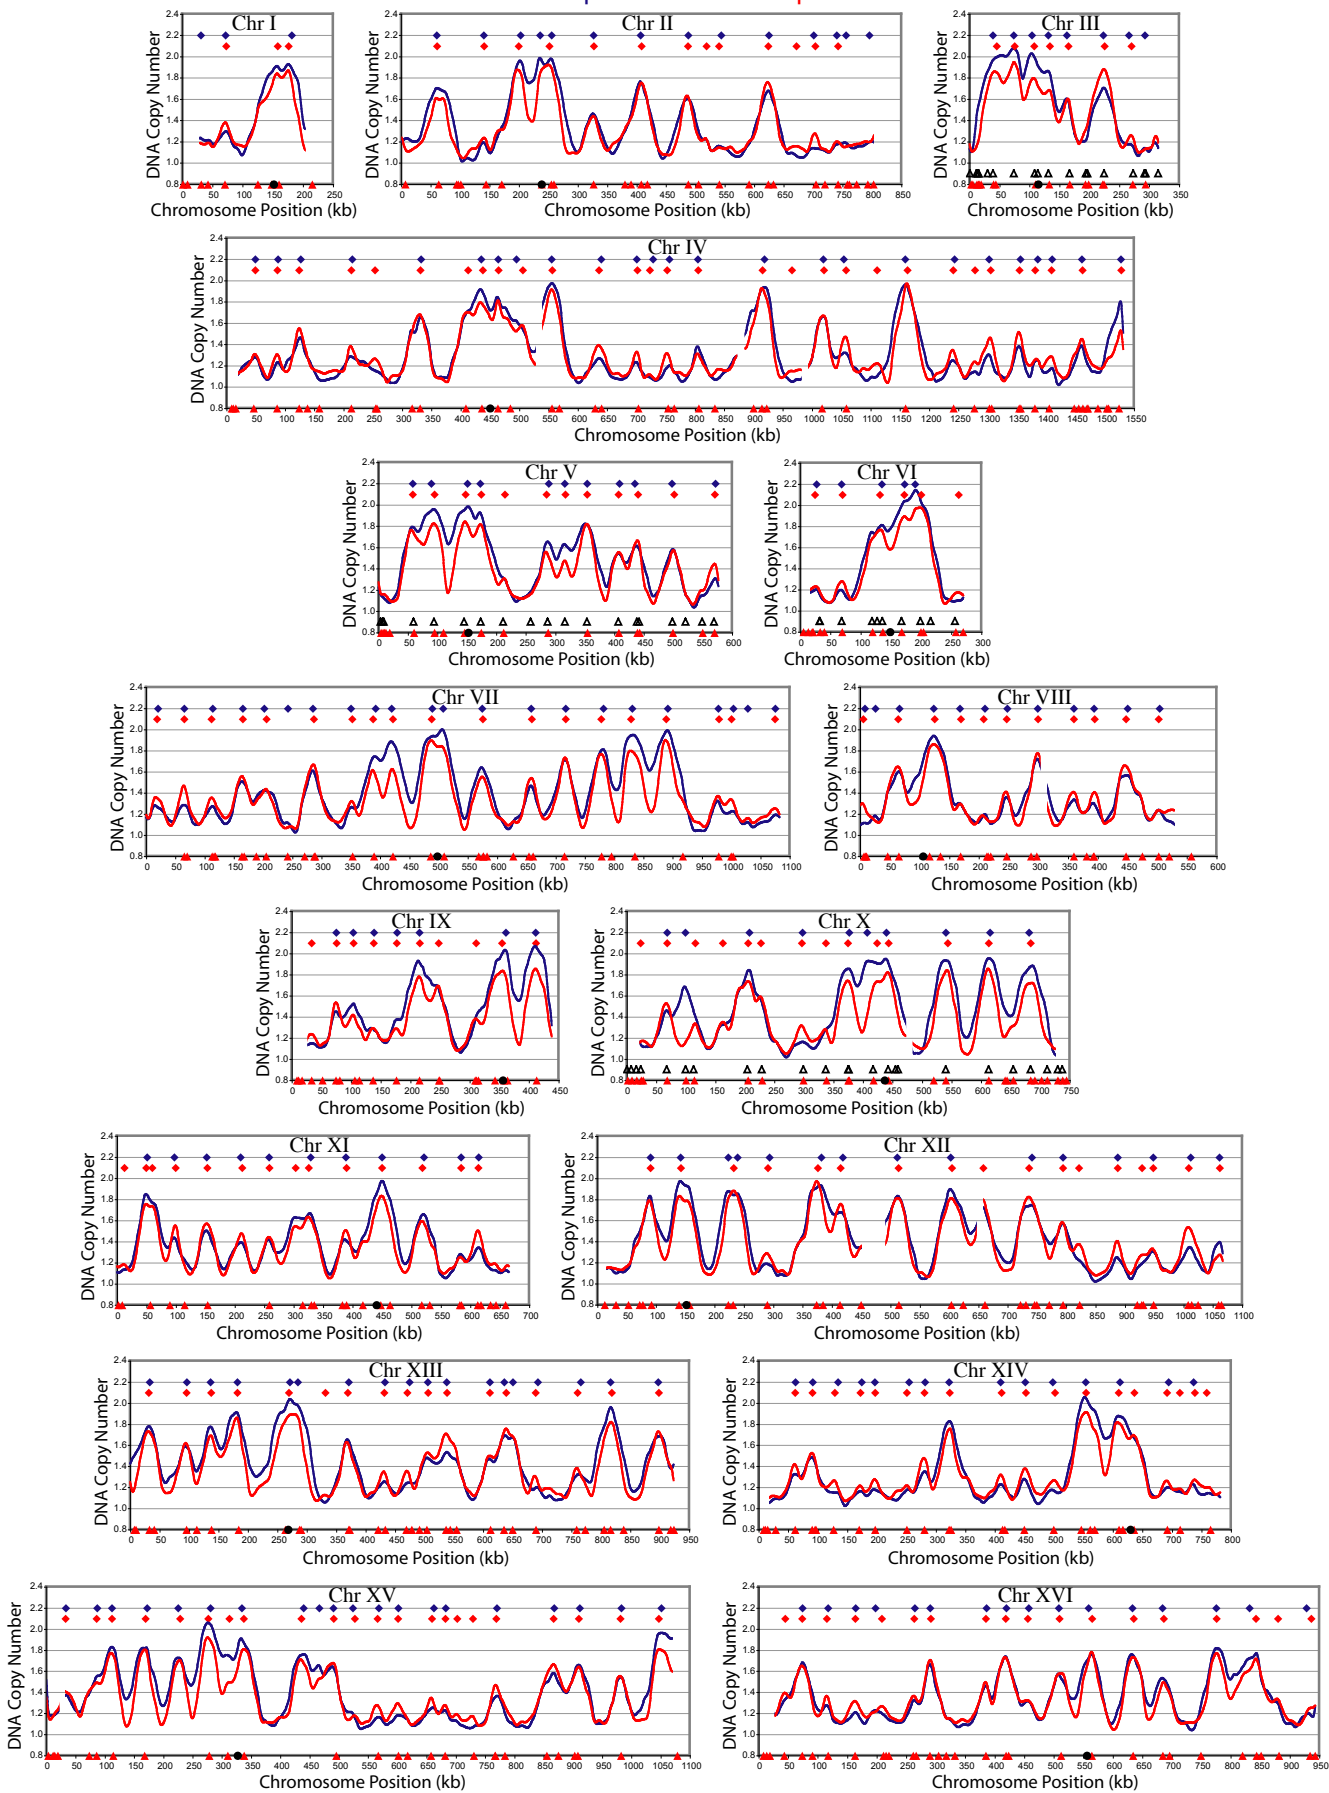

# Supplemental Figure 6

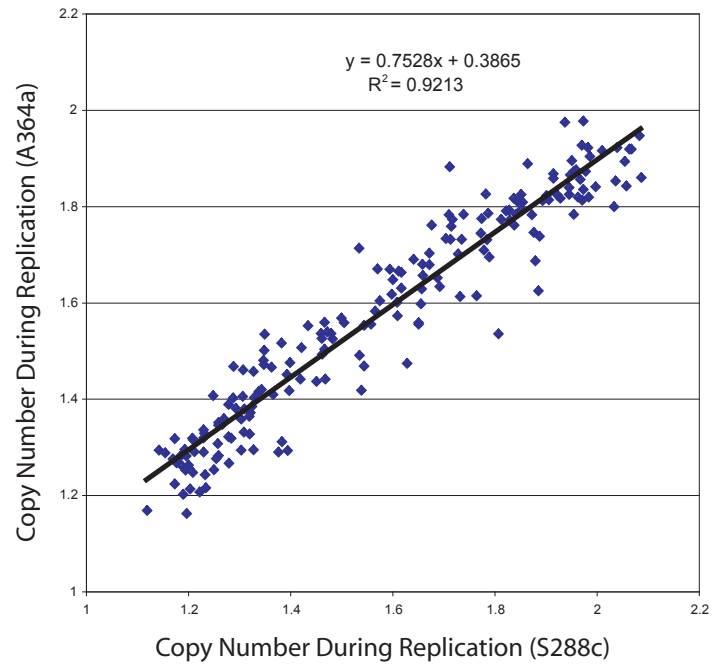

# Supplemental Figure 7

OMC S phase      OMC G2/M

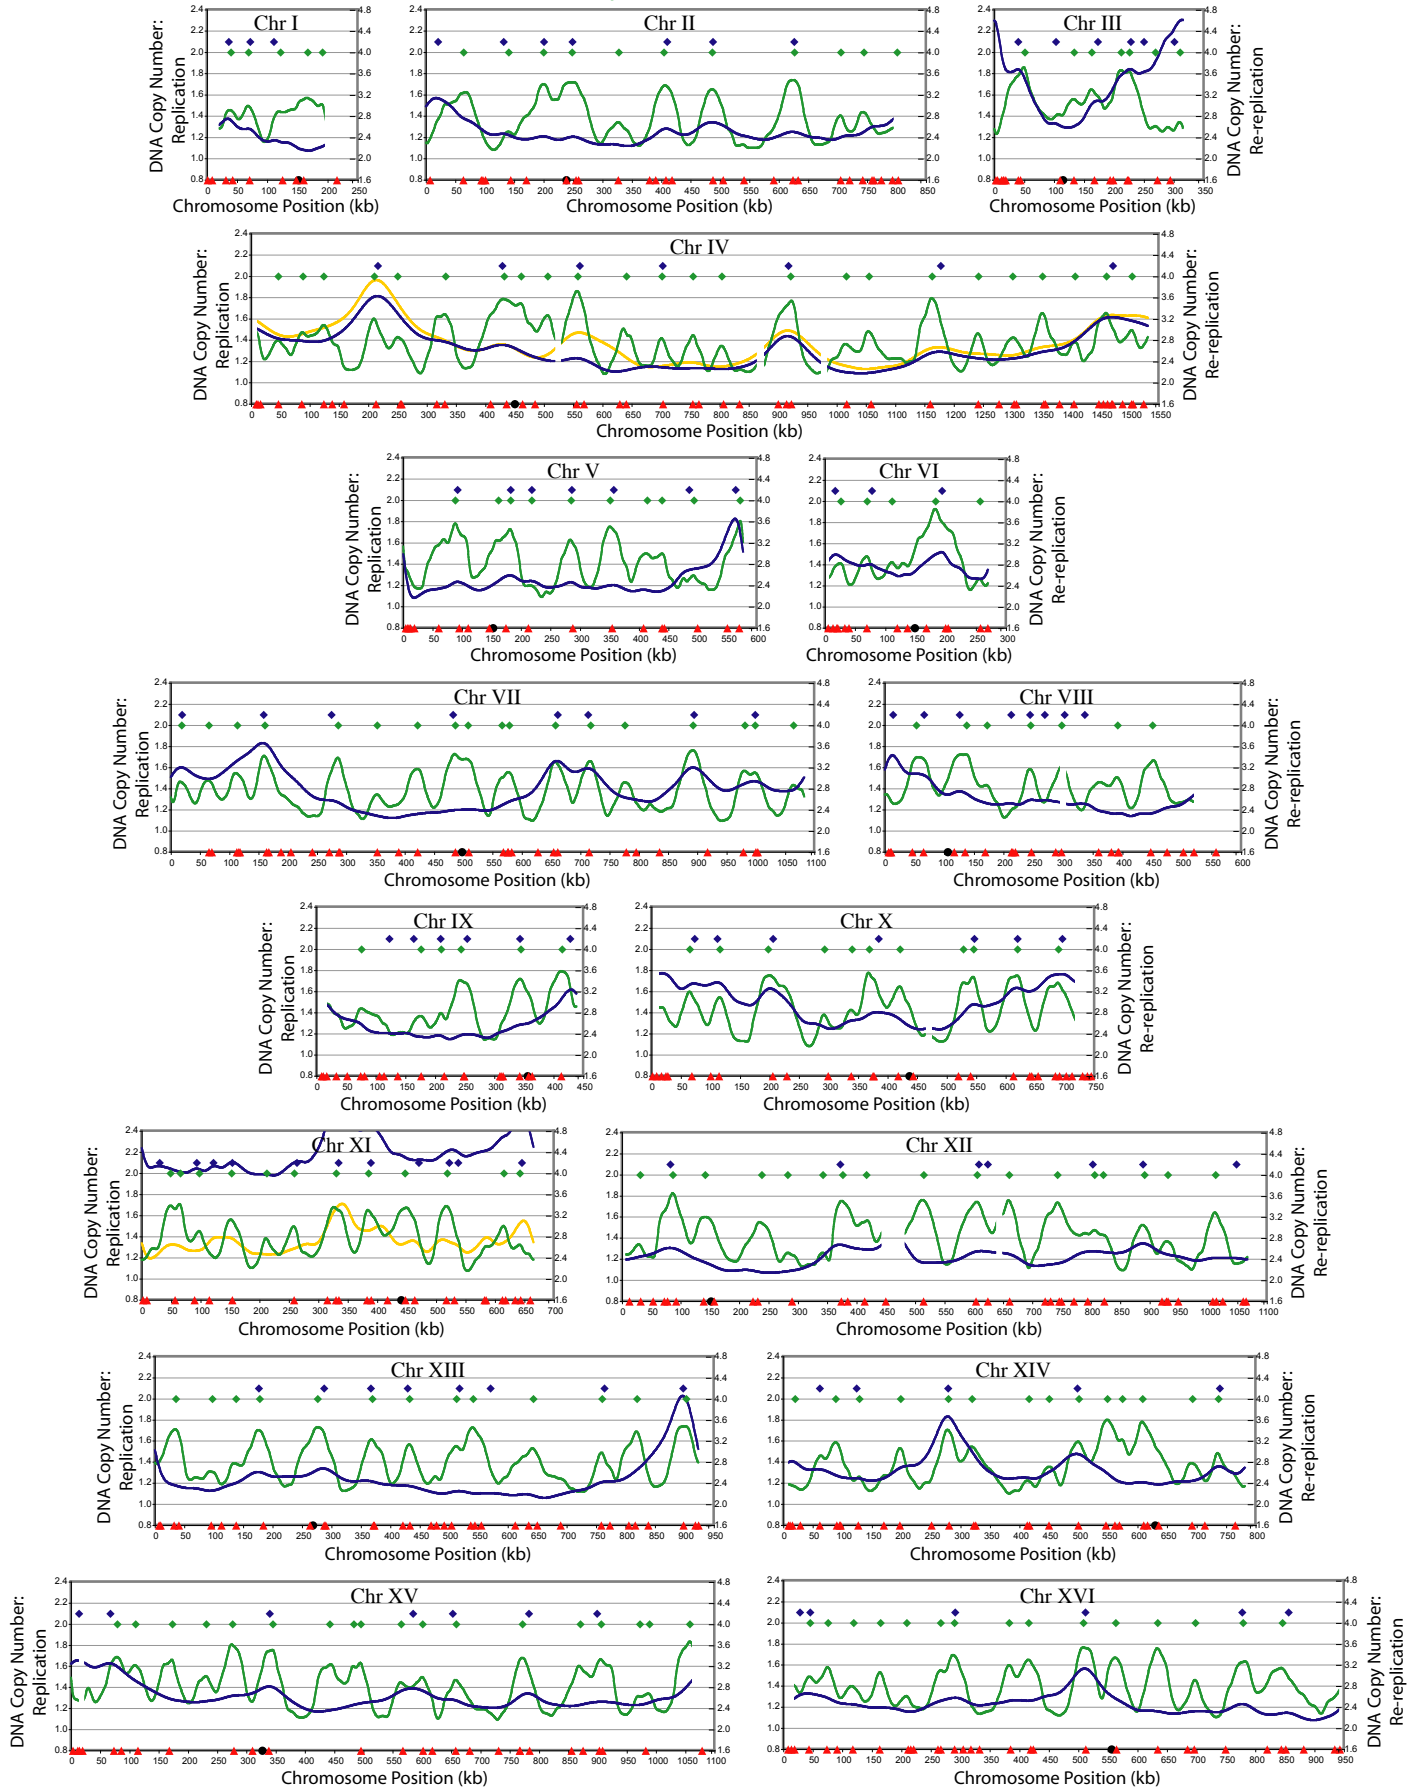

Supplemental Figure 8

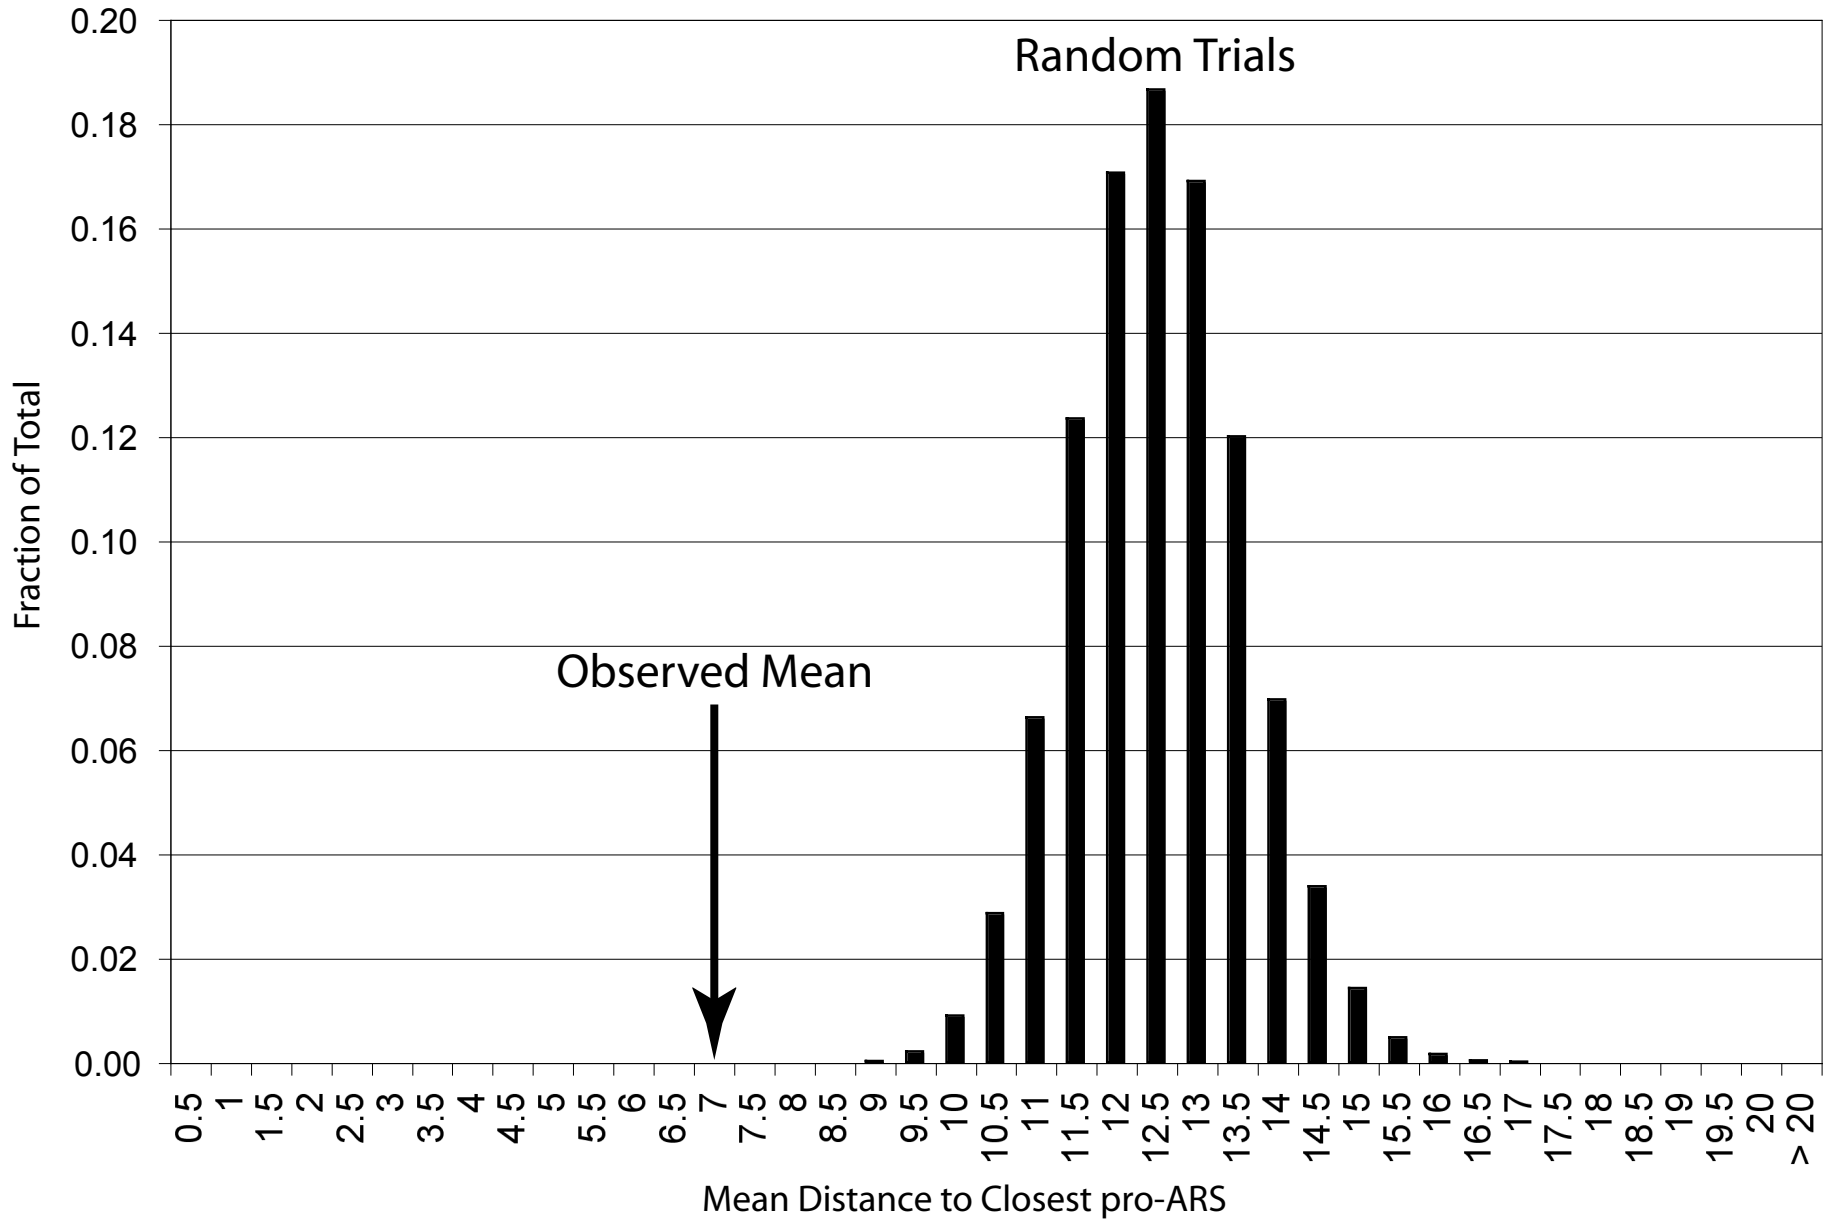



# Supplemental Figure 9

## OMC S Re-rep

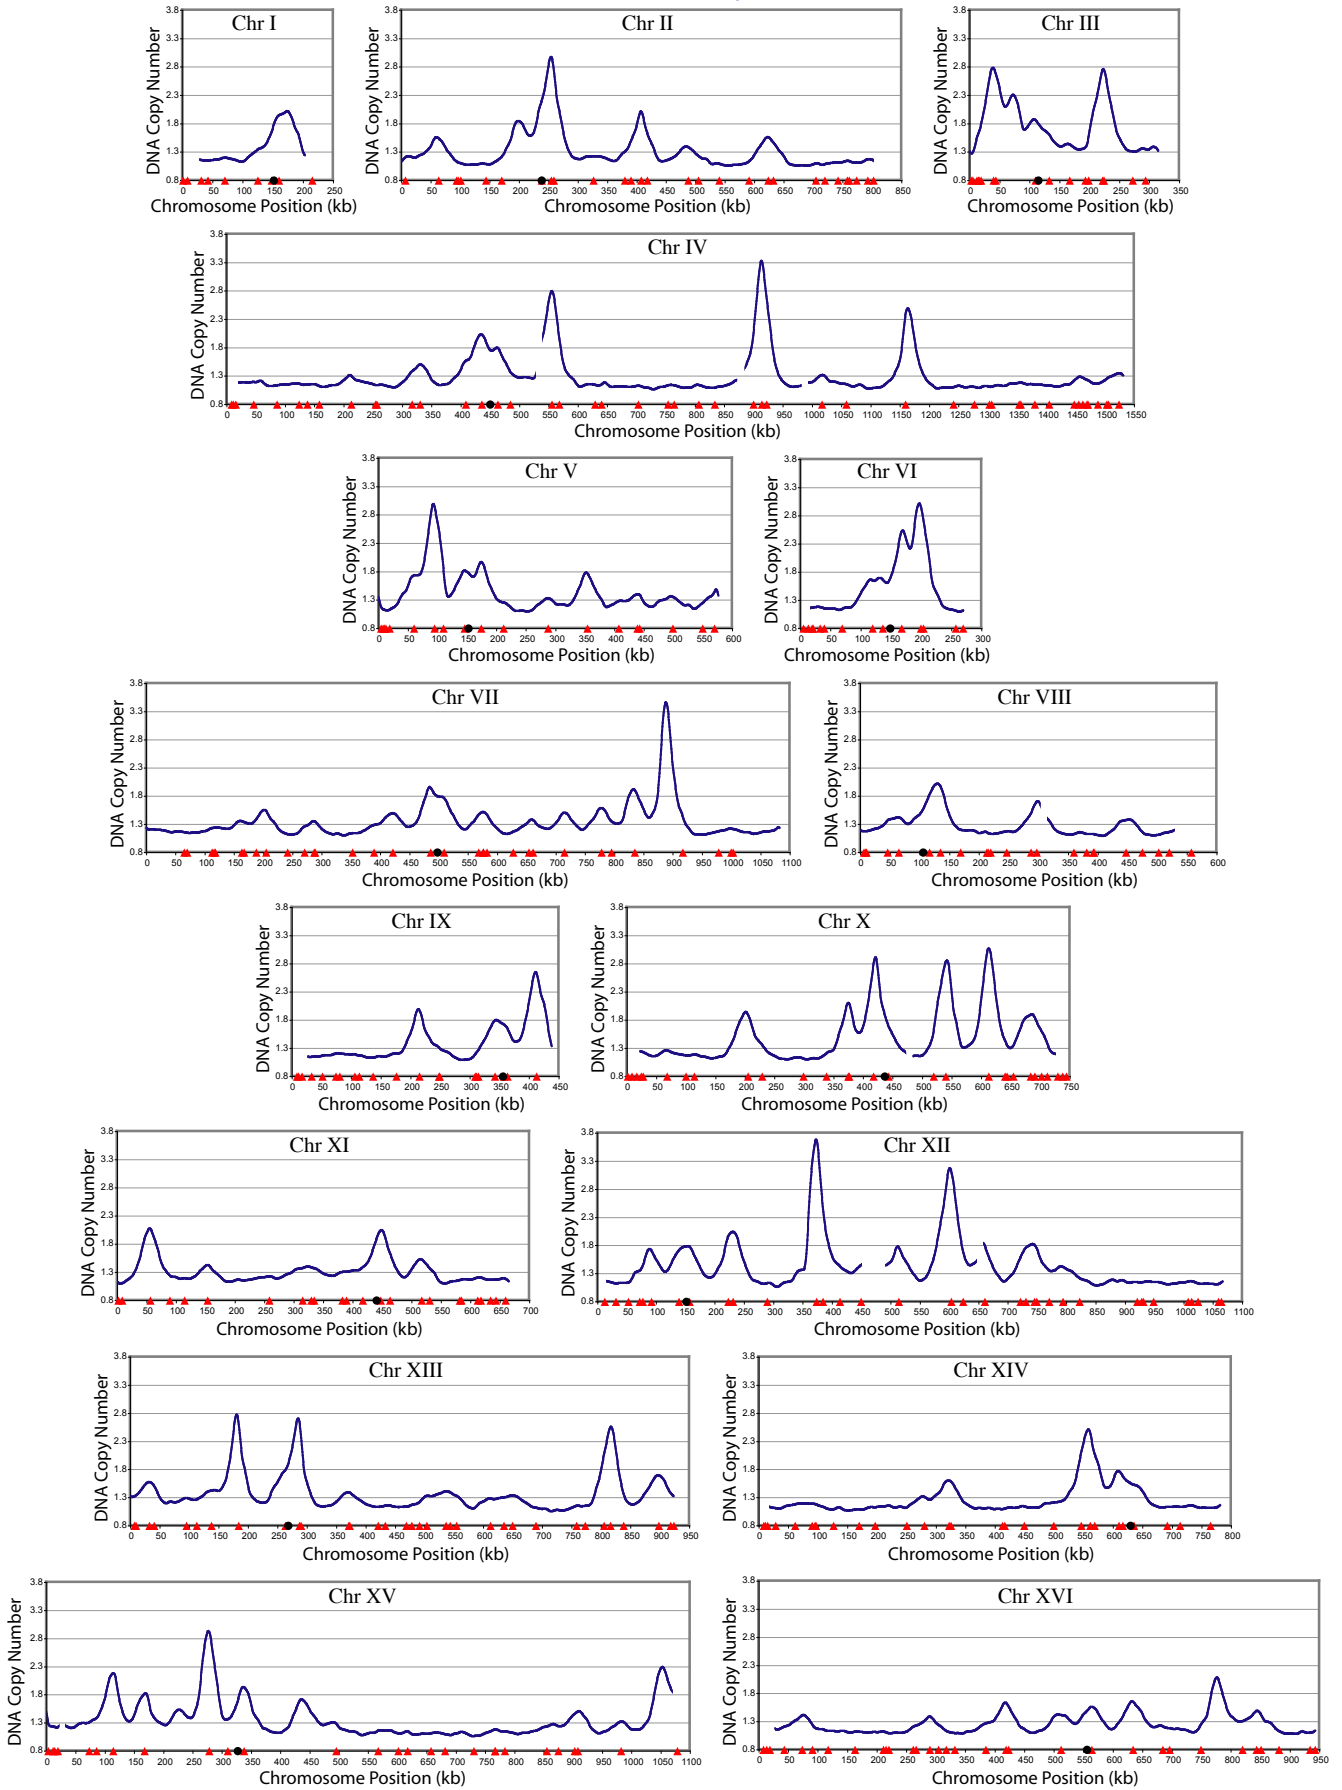

# Supplemental Figure 10

OMC G1 to G2/M

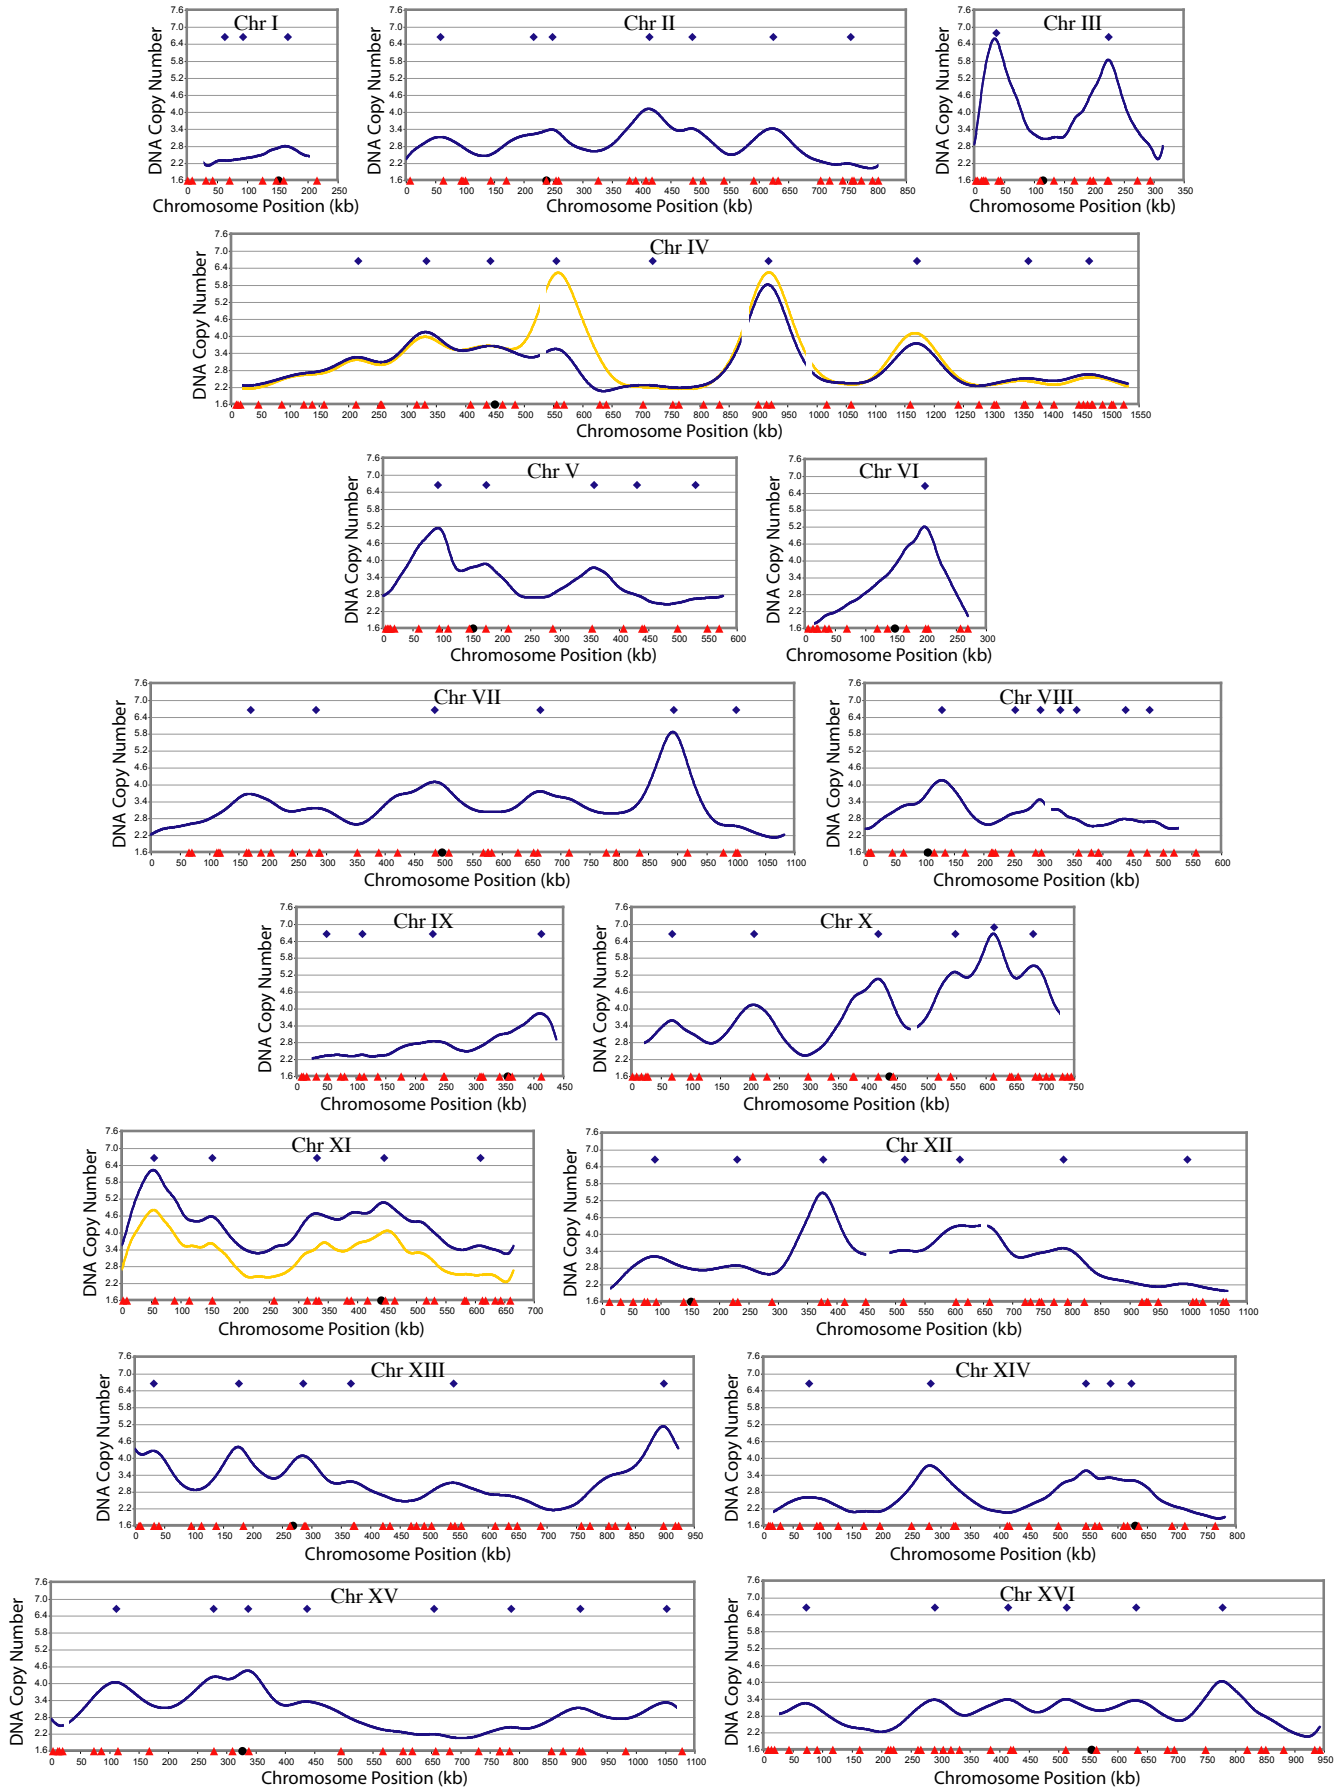

# Supplemental Figure 11

OC G2/M      OC G1 to G2/M

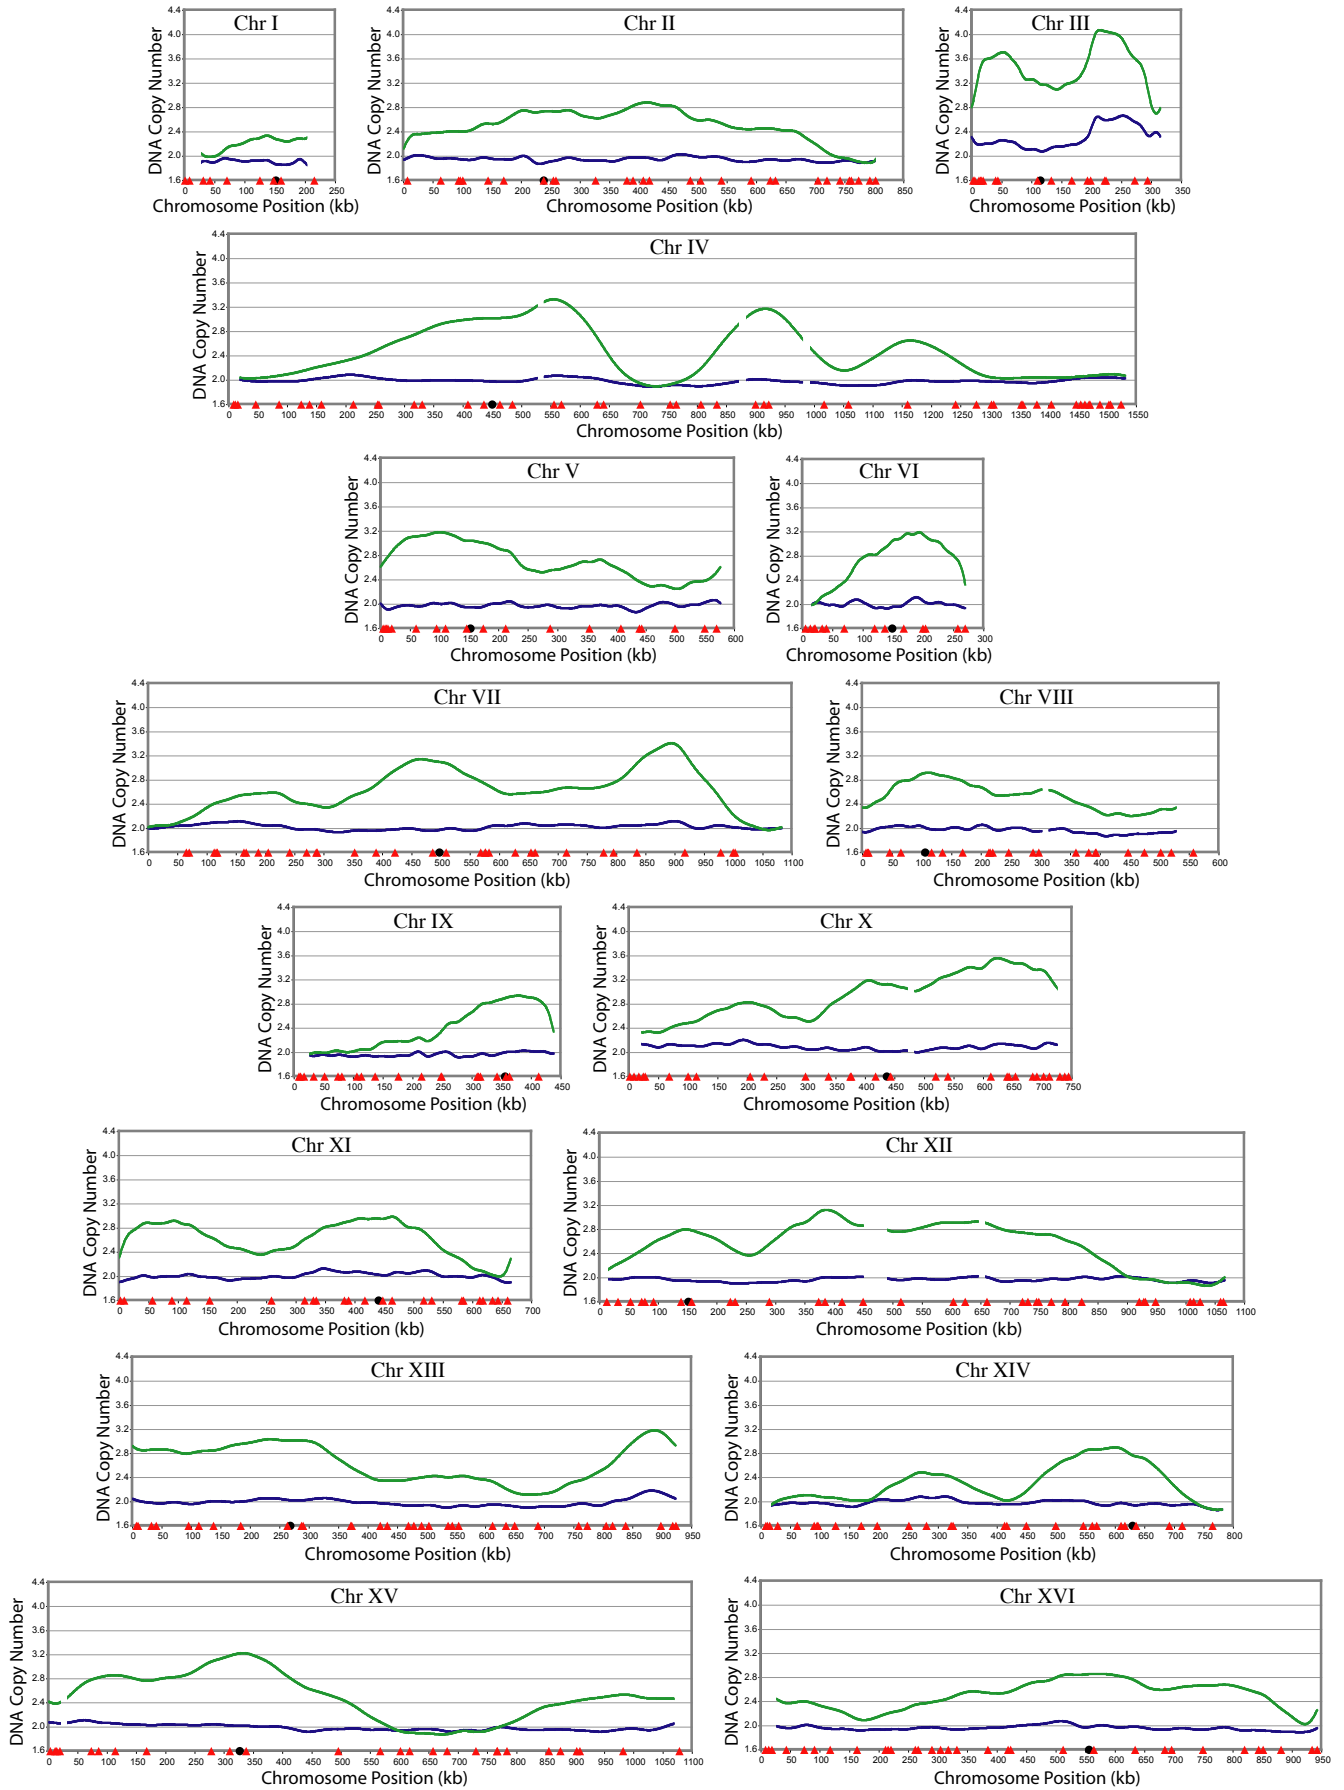

# Supplemental Figure 12

MC<sub>2A</sub> G2/M

MC<sub>2A</sub> G1 to G2/M

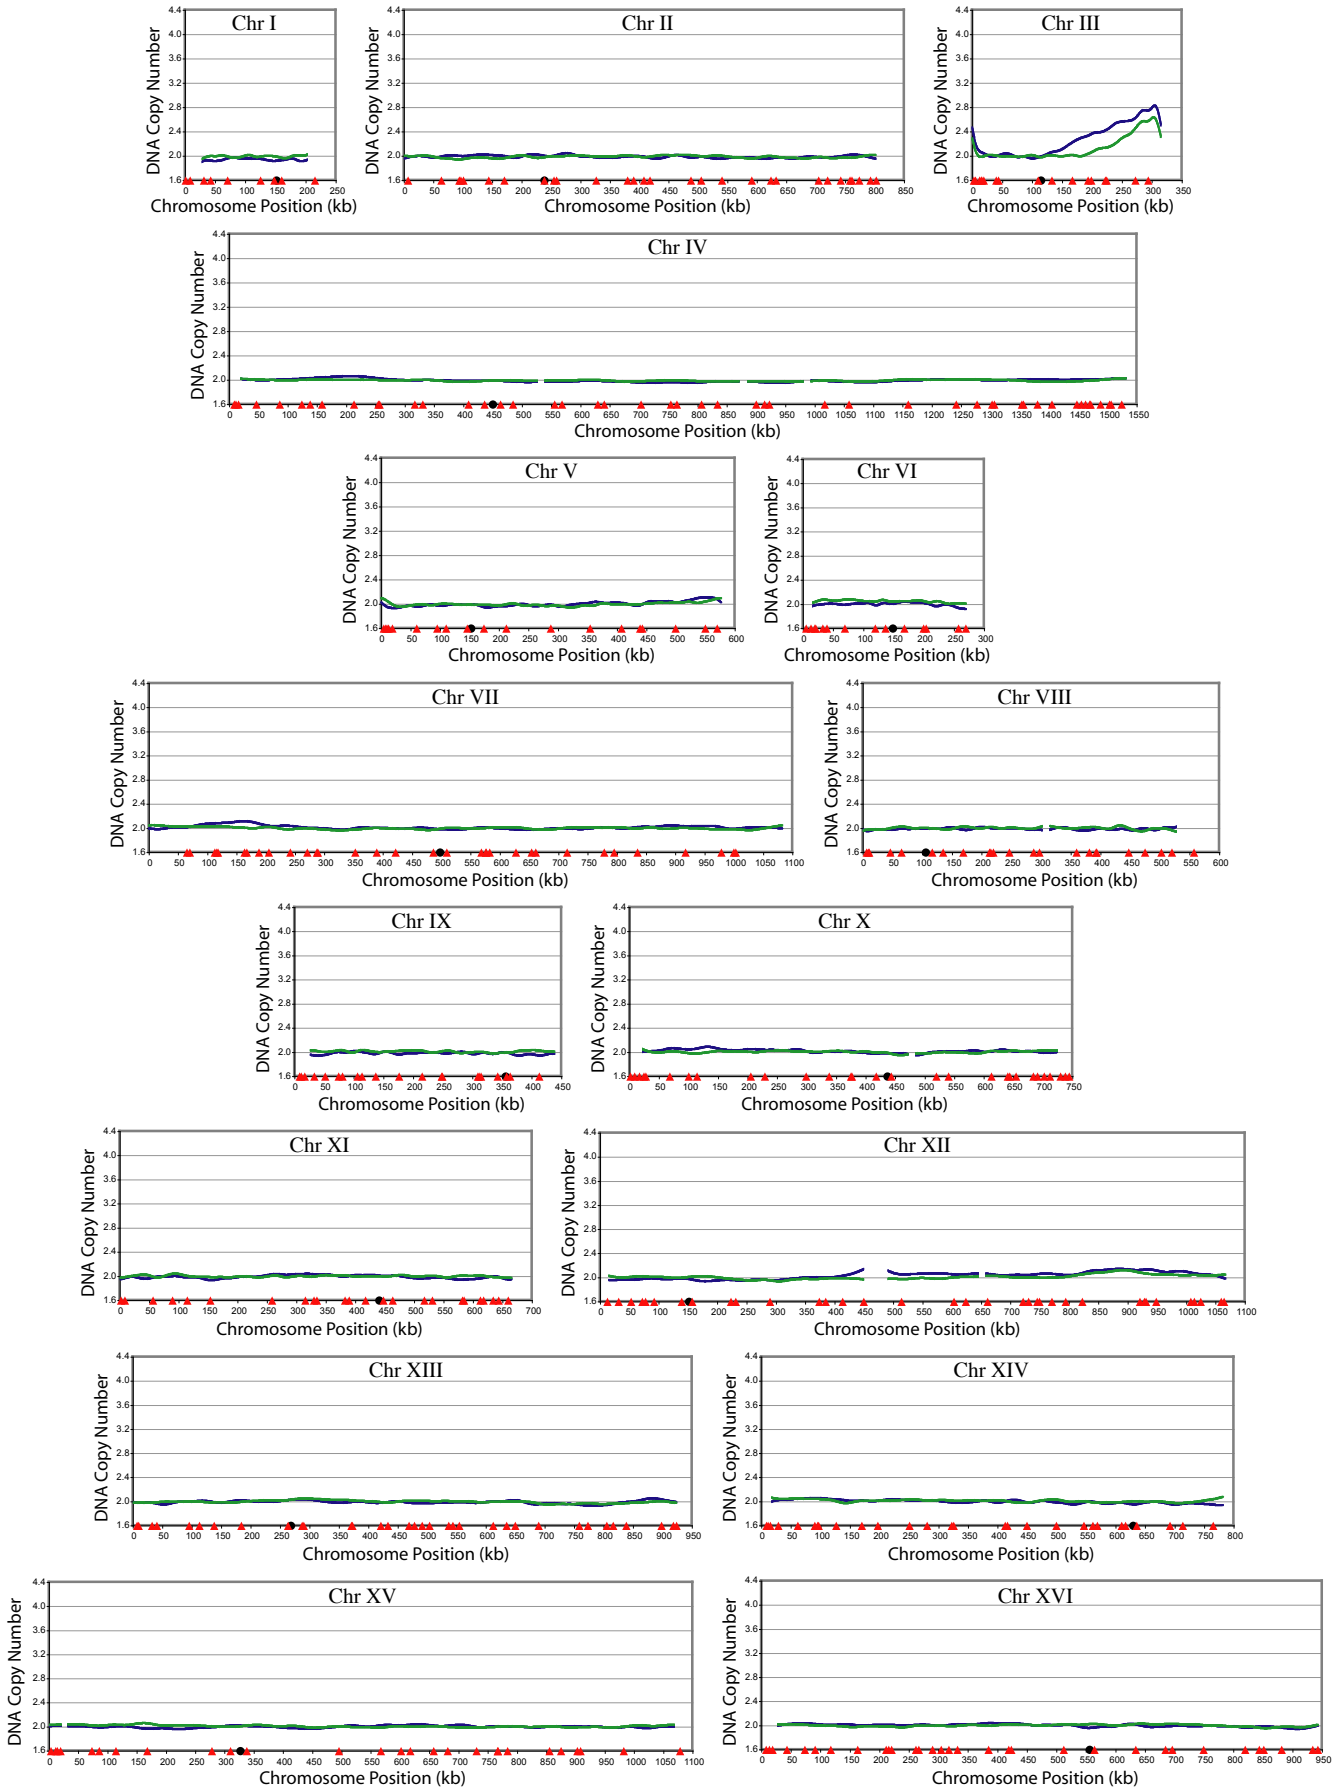

# Supplemental Figure 13

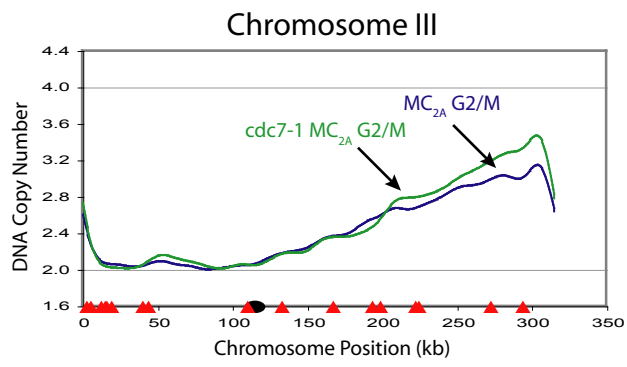

Supplement: mbc_E05-11-1043_3.pdf [file mbc_E05-11-1043_3.pdf]
